# Supplementary material for: Association between adverse childhood experiences and adult diseases in older adults: a comparative cross-sectional study in Japan and Finland
Source: PubMed Central journal article supplement — BMJ Open. 2019 Aug 24;9(8):e024609. doi: 10.1136/bmjopen-2018-024609 (PMC6720330; doi:10.1136/bmjopen-2018-024609), 2019-08-24
Supplement: bmjopen-2018-024609supp001.pdf [file bmjopen-2018-024609supp001.pdf]

1 **Supplemental table S1.** Measurement of adverse childhood experience

2 **Supplemental table S2.** Measurement of health and health behaviours

3

4 Supplemental table S1. Measurement of adverse childhood experience

| Items                                | JAGES                                                                               |                  |         | FPS, HeSSup                                                                                           |                           |         |
|--------------------------------------|-------------------------------------------------------------------------------------|------------------|---------|-------------------------------------------------------------------------------------------------------|---------------------------|---------|
|                                      | Question                                                                            | Answer           | Code    | Question                                                                                              | Answer                    | Code    |
|                                      | Did you experience any of the following before the age of 18?;                      |                  |         | The respondents were asked whether they had experienced the following adversities in their childhood: |                           |         |
| <b>Parental divorce in childhood</b> | Parents' divorce                                                                    | No               | 0       | Divorce/separation of the parents                                                                     | No                        | 0       |
|                                      |                                                                                     | Yes              | 1       |                                                                                                       | Yes                       | 1       |
|                                      |                                                                                     | Unknown          | missing |                                                                                                       | Do not know or cannot say | missing |
| <b>Severe financial difficulties</b> | Financial trouble                                                                   | No               | 0       | Long-term financial difficulties in the family                                                        | No                        | 0       |
|                                      |                                                                                     | Yes              | 1       |                                                                                                       | Yes                       | 1       |
|                                      |                                                                                     | Unknown          | missing |                                                                                                       | Do not know or cannot say | missing |
| <b>Fear of a family member</b>       | 1) Your father was violent with your mother<br>(being witness to domestic violence) | No               | 0       | Frequent fear for a family member                                                                     | No                        | 0       |
|                                      | 2) You were hit hard by your mother/father causing an injury<br>(physical abuse)    | Yes <sup>a</sup> | 1       |                                                                                                       | Yes                       | 1       |
|                                      |                                                                                     | Unknown          | missing |                                                                                                       | Do not know or cannot say | missing |

a: If someone answers yes to the question of either of 1) or 2), the code is "Yes".

5

6

| Items                   | JAGES                                                                                                                                                                          |                  |      | FPS                                                                                    |                    |         |
|-------------------------|--------------------------------------------------------------------------------------------------------------------------------------------------------------------------------|------------------|------|----------------------------------------------------------------------------------------|--------------------|---------|
|                         | Question                                                                                                                                                                       | Answer           | Code | Question                                                                               | Answer             | Code    |
| Self-rated health       | How is your current health status?                                                                                                                                             | Excellent        | 0    | <b>How is your current health status?</b>                                              | Good               | 0       |
|                         |                                                                                                                                                                                | Good             | 0    |                                                                                        | Fairly good        | 0       |
|                         |                                                                                                                                                                                | Fair             | 1    |                                                                                        | Moderate           | 1       |
|                         |                                                                                                                                                                                | Poor             | 1    |                                                                                        | Fairly poor        | 1       |
|                         |                                                                                                                                                                                |                  |      |                                                                                        | Poor               | 1       |
| Cancer                  | Circle the number of all diseases for which you are currently receiving treatment or experiencing; Cancer                                                                      | No               | 0    | National Cancer Register                                                               | No                 | 0       |
|                         |                                                                                                                                                                                | Yes              | 1    |                                                                                        | Yes within 5 years | 1       |
|                         |                                                                                                                                                                                |                  |      |                                                                                        | Unknown            | Missing |
| Heart disease or stroke | Circle the number of all diseases for which you are currently receiving treatment or experiencing;<br>1) Heart disease, 2) Stroke (e.g. brain hemorrhage, cerebral infarction) | No               | 0    | Special reimbursement for the medication, from Social Insurance Institution of Finland | No                 | 0       |
|                         |                                                                                                                                                                                | Yes <sup>a</sup> | 1    |                                                                                        | Yes                | 1       |
|                         |                                                                                                                                                                                |                  |      |                                                                                        | Unknown            | Missing |
| Diabetes mellitus       | Circle the number of all diseases for which you are currently receiving treatment or experiencing; Diabetes mellitus                                                           | No               | 0    | Special reimbursement for the medication, from Social Insurance Institution of Finland | No                 | 0       |
|                         |                                                                                                                                                                                | Yes              | 1    |                                                                                        | Yes                | 1       |
|                         |                                                                                                                                                                                |                  |      |                                                                                        | Unknown            | Missing |
| Smoking                 | Do you smoke cigarettes?                                                                                                                                                       | No               | 0    | Do you smoke or have you ever smoked regularly, i.e. every day or almost every day?    | Never              | 0       |

I used to

1

smoke

Yes, before

1

Yes

2

Yes, I still do

2

---

a: If someone answers yes to the question of either of 1) or 2), the code is "Yes".

8

9
